# Supplementary material
Source: PubMed Central journal article supplement (PMC8033419)
Supplement: NIHMS1608688-supplement-figure_e4.pdf [file NIHMS1608688-supplement-figure_e4.pdf]

Figure E4

RT-PCR

Lesional vs. Normal

|  | N | PSO | AD | NS | LI | CIE | EI |                    | PSO      | AD        | NS       | LI        | CIE      | EI |
|--|---|-----|----|----|----|-----|----|--------------------|----------|-----------|----------|-----------|----------|----|
|  |   |     |    |    |    |     |    | EREG---: 1.82**    | 1.05     | 5.59**    | 2.99**   | 5.90**    | 4.81**   |    |
|  |   |     |    |    |    |     |    | IL36B--: 2.16**    | -1.00    | 2.86**    | 4.30**   | 5.13**    | 4.35**   |    |
|  |   |     |    |    |    |     |    | IL36A--: 6020.00** | 460.00** | 2740.00** | 950.00** | 1700.00** | 292.00** |    |
|  |   |     |    |    |    |     |    | IL36G--: 23.60**   | 5.92**   | 38.00**   | 14.40**  | 22.30**   | 14.90**  |    |
|  |   |     |    |    |    |     |    | KYNU---: 12.50**   | 4.59**   | 13.60**   | 9.82**   | 11.80**   | 6.43**   |    |
|  |   |     |    |    |    |     |    | VNN1---: 5.14**    | 1.97*    | 4.76**    | 4.70**   | 5.82**    | 2.78**   |    |
|  |   |     |    |    |    |     |    | VNN3---: 196.00**  | 5.39*    | 227.00**  | 155.00** | 163.00**  | 55.70**  |    |
|  |   |     |    |    |    |     |    | KLK13--: 8.06**    | 1.84+    | 11.60**   | 4.77**   | 5.98**    | 5.64**   |    |
|  |   |     |    |    |    |     |    | IL17F--: 253.00**  | 4.57+    | 307.00**  | 59.50**  | 95.60**   | 57.30**  |    |
