# Supplementary material
Source: PubMed Central journal article supplement (PMC8033419)

Figure E1

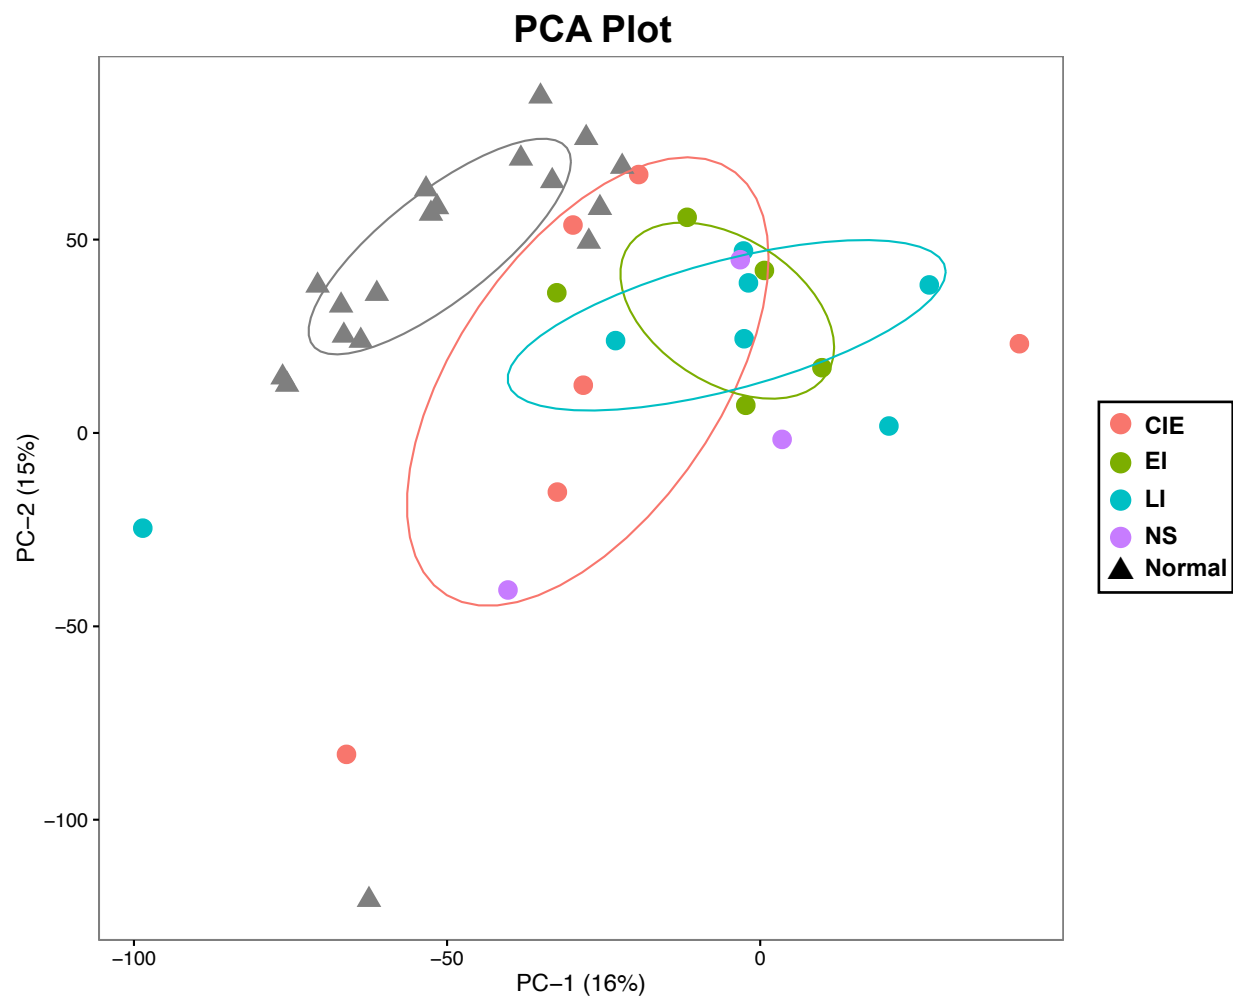

Supplement: NIHMS1608688-supplement-figure_e1.pdf [file NIHMS1608688-supplement-figure_e1.pdf]

Figure E3

### Common Ichthyosis Phenotype: Upregulated DEGs

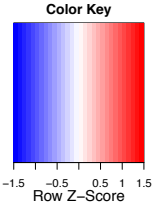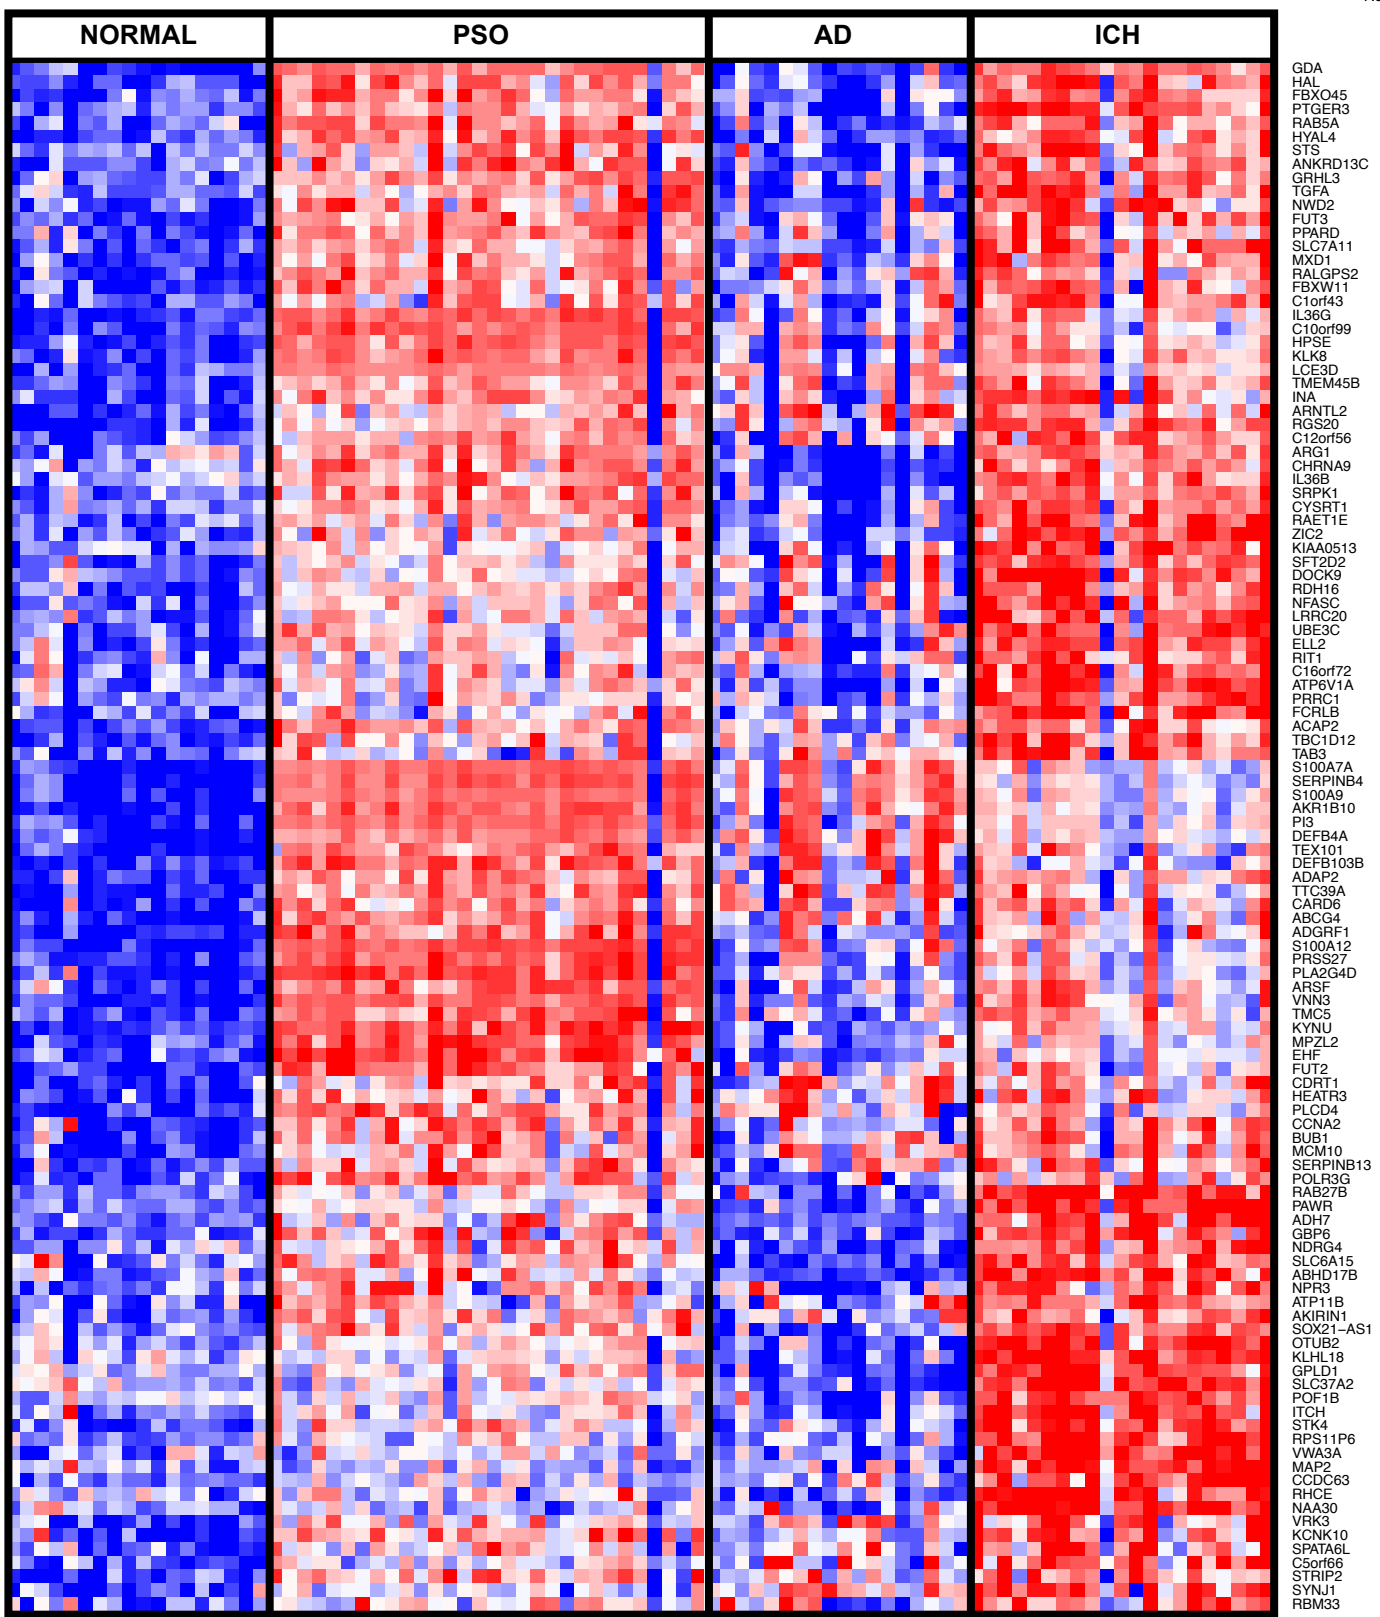

Supplement: NIHMS1608688-supplement-figure_e3.pdf [file NIHMS1608688-supplement-figure_e3.pdf]
